# Supplementary material for: Irritant and repellent behaviors of sterile male Aedes aegypti (L.) (Diptera: Culicidae) mosquitoes are crucial in the development of disease control strategies applying sterile insect technique
Source: PeerJ. 2024 Mar 22;12:e17038. doi: 10.7717/peerj.17038 (PMC10962334; doi:10.7717/peerj.17038)
Supplement: Supplemental Information 2 [file peerj-12-17038-s002.xls]

## Sheet: DEET 2.5% -SIT
Species	Ae. aegypti (male)					test				DEET					Conc.	2.5		%			Status		Sterile
Chamber		(1) Control Noncontact						(2) Treatment NonC						(3) Control Contact						(4) Treat Contact
Rep.		1	2	3	4	Total		1	2	3	4	Total		1	2	3	4	Total		1	2	3	4	Total
No. of Test		15	15	15	15	60		15	15	15	15	60		15	15	15	15	60		15	15	15	15	60		T
Time 0						0						0						0						0		0
1						0			1			1		1				1			1			1		1
2						0		1				1						0					1	1		2
3						0						0						0		1				1		3
4						0						0						0						0		4
5						0				1		1					1	1					1	1		5
6						0						0						0						0		6
7						0						0						0		1				1		7
8						0						0						0			1			1		8
9						0						0			1			1						0		9
10						0		1				1						0		1				1		10
11						0						0						0					1	1		11
12						0						0						0						0		12
13				1		1						0						0						0		13
14						0						0						0			2			2		14
15						0						0						0					1	1		15
16						0						0						0		1				1		16
17						0						0						0						0		17
18						0				1		1						0						0		18
19					1	1						0						0						0		19
20						0						0						0		1				1		20
21						0						0						0						0		21
22				1		1						0				1		1		1				1		22
23						0						0						0						0		23
24						0			1			1						0		1				1		24
25						0						0						0						0		25
26						0						0						0						0		26
27		1				1						0						0						0		27
28						0						0						0						0		28
29						0						0						0				1		1		29
30						0				1		1						0						0		30
Total		1	0	2	1	4	0	2	2	3	0	7	0	1	1	1	1	4	0	7	4	1	4	16
number of mosquito nockdown (1-hr)						Total						Total						Total						Total
Escape chamber		0	0	0	0	0		1	1	0	0	2		0	0	0	0	0		0	0	0	0	0
Non escape chamber		0	0	0	0	0		0	0	1	0	1		0	0	0	0	0		0	2	0	0	2
number of mosquito mortality (24-hr)						Total						Total						Total						Total
Escape chamber		1	0	0	0	1		1	0	0	0	1		0	0	0	0	0		1	0	0	0	1
Non escape chamber		0	0	0	1	1		0	0	0	0	0		0	0	0	0	0		0	0	0	0	0

## Sheet: DEET 2.5% Non SIT
Species	Ae. aegypti (male)					test				DEET					Conc.	2.5		%			Status		non-sterile
Chamber		(1) Control Noncontact						(2) Treatment NonC						(3) Control Contact						(4) Treat Contact
Rep.		1	2	3	4	Total		1	2	3	4	Total		1	2	3	4	Total		1	2	3	4	Total
No. of Test		15	15	15	15	60		15	15	15	15	60		15	15	15	15	60		15	15	15	15	60		T
Time 0						0						0						0						0		0
1						0						0		1				1		1			1	2		1
2			1			1			1			1		1				1				1		1		2
3						0						0			1			1		1		1		2		3
4						0						0						0			1		1	2		4
5						0						0						0		1		1		2		5
6						0						0						0						0		6
7						0						0						0				1		1		7
8						0					1	1						0						0		8
9						0				2		2						0						0		9
10						0						0						0						0		10
11						0						0						0						0		11
12						0						0						0						0		12
13						0						0						0						0		13
14						0						0						0						0		14
15						0						0						0						0		15
16						0						0						0		1				1		16
17						0						0						0						0		17
18						0						0						0						0		18
19						0						0						0		1				1		19
20						0						0						0					1	1		20
21						0						0						0						0		21
22		1				1						0						0				1		1		22
23						0						0						0						0		23
24						0						0						0						0		24
25						0					1	1						0		1		1		2		25
26						0						0						0						0		26
27		1				1						0						0				1		1		27
28						0						0						0						0		28
29						0						0						0			1			1		29
30						0						0						0						0		30
Total		2	1	0	0	3	0	0	1	2	2	5	0	2	1	0	0	3	0	6	2	7	3	18
number of mosquito nockdown (1-hr)						Total						Total						Total						Total
Escape chamber		0	0	0	0	0		1	1	0	0	2		0	0	0	0	1		0	0	0	0	0
Non escape chamber		0	0	0	0	0		0	0	1	0	1		0	0	0	0	0		0	2	0	0	2
number of mosquito mortality (24-hr)						Total						Total						Total						Total
Escape chamber		0	0	0	0	0		0	0	0	1	1		0	0	0	0	0		1	0	0	0	1
Non escape chamber		0	0	0	0	0		0	0	0	0	0		0	0	0	0	0		0	0	0	0	0

## Sheet: DEET 5% -SIT
Species	Ae. aegypti (male)					test				DEET					Conc.	5		%			Status		sterile
Chamber		(1) Control Noncontact						(2) Treatment NonC						(3) Control Contact						(4) Treat Contact
Rep.		1	2	3	4	Total		1	2	3	4	Total		1	2	3	4	Total		1	2	3	4	Total
No. of Test		15	15	15	15	60		15	15	15	15	60		15	15	15	15	60		15	15	15	15	60		T
Time 0						0						0						0						0		0
1						0			1			1		1				1			1			1		1
2						0		1				1						0						0		2
3						0						0			2			2		1				1		3
4						0						0						0						0		4
5						0						0					1	1					1	1		5
6						0						0						0			1			1		6
7						0			2			2						0						0		7
8						0					3	3						0						0		8
9						0						0			1			1						0		9
10						0		1				1						0					1	1		10
11						0						0						0					1	1		11
12						0						0						0						0		12
13				1		1						0						0						0		13
14						0						0						0			2			2		14
15			2			2						0						0					1	1		15
16						0						0						0		1				1		16
17						0						0						0						0		17
18						0						0						0						0		18
19					1	1						0						0						0		19
20						0						0						0		1				1		20
21						0						0						0						0		21
22				1		1						0				1		1		1				1		22
23						0						0						0					2	2		23
24						0						0						0		1				1		24
25						0						0						0						0		25
26						0						0						0			1			1		26
27		1				1						0						0						0		27
28						0						0						0						0		28
29						0						0						0				1		1		29
30						0						0						0						0		30
Total		1	2	2	1	6	0	2	3	0	3	8	0	1	3	1	1	6	0	5	5	1	6	17
number of mosquito nockdown (1-hr)						Total						Total						Total						Total
Escape chamber		0	0	0	0	0		0	0	0	0	0		0	0	0	0	0		0	0	0	0	0
Non escape chamber		0	0	0	0	0		0	0	1	0	1		1	0	0	0	1		0	0	0	0	0
number of mosquito mortality (24-hr)						Total						Total						Total						Total
Escape chamber		1	0	0	0	1		1	0	0	0	1		0	0	0	0	0		1	0	1	0	2
Non escape chamber		0	0	0	1	1		0	0	0	0	0		0	0	0	0	0		0	0	0	0	0

## Sheet: DEET 5% Non SIT
Species	Ae. aegypti (male)					test				DEET					Conc.	5		%			Status		non-sterile
Chamber		(1) Control Noncontact						(2) Treatment NonC						(3) Control Contact						(4) Treat Contact
Rep.		1	2	3	4	Total		1	2	3	4	Total		1	2	3	4	Total		1	2	3	4	Total
No. of Test		15	15	15	15	60		15	15	15	15	60		15	15	15	15	60		15	15	15	15	60		T
Time 0						0						0						0						0		0
1						0						0		1				1		1				1		1
2			1			1			1			1		1				1			1			1		2
3						0						0			1			1						0		3
4						0						0						0						0		4
5						0					2	2						0						0		5
6						0						0						0						0		6
7						0						0						0						0		7
8						0					1	1						0					2	2		8
9				2		2				2		2						0						0		9
10						0						0						0			2			2		10
11						0						0						0					4	4		11
12						0						0						0				3		3		12
13						0						0						0						0		13
14						0						0						0				2		2		14
15						0						0						0						0		15
16						0						0						0		1				1		16
17						0						0						0						0		17
18						0						0						0						0		18
19						0						0						0						0		19
20						0						0						0					1	1		20
21						0						0						0						0		21
22		1				1						0						0						0		22
23						0						0						0						0		23
24						0						0						0						0		24
25						0					1	1						0						0		25
26						0						0			1			1						0		26
27		1				1						0						0				1		1		27
28						0						0						0						0		28
29						0						0						0			1			1		29
30						0						0						0						0		30
Total		2	1	2	0	5	0	0	1	2	4	7	0	2	2	0	0	4	0	2	4	6	7	19
number of mosquito nockdown (1-hr)						Total						Total						Total						Total
Escape chamber		0	0	0	0	0		0	0	0	0	0		0	0	0	0	0		0	0	0	0	0
Non escape chamber		0	0	0	0	0		0	1	1	0	2		0	0	0	0	0		1	0	0	0	1
number of mosquito mortality (24-hr)						Total						Total						Total						Total
Escape chamber		0	0	0	0	0		1	0	0	0	1		0	0	0	0	0		1	0	0	0	1
Non escape chamber		0	0	0		0		0	0	0	0	0		0	0	0	0	0		1	1	2	0	4
