# Supplementary material for: Irritant and repellent behaviors of sterile male Aedes aegypti (L.) (Diptera: Culicidae) mosquitoes are crucial in the development of disease control strategies applying sterile insect technique
Source: PeerJ. 2024 Mar 22;12:e17038. doi: 10.7717/peerj.17038 (PMC10962334; doi:10.7717/peerj.17038)
Supplement: Supplemental Information 3 [file peerj-12-17038-s003.xls]

## Sheet: Del-SIT
Species	Ae. Aegypti (male)					test				deltametrin					Conc.	0.0007		%			Status		Sterile
Chamber		(1) Control Noncontact						(2) Treatment NonC						(3) Control Contact						(4) Treat Contact
Rep.		1	2	3	4	Total		1	2	3	4	Total		1	2	3	4	Total		1	2	3	4	Total
No. of Test		15	14	15	16	60		15	15	15	15	60		15	15	15	15	60		15	15	15	15	60		T
Time 0						0						0				1		1						0		0
1						0						0						0		1				1		1
2		1				1			1			1						0						0		2
3						0				2		2		1				1			2			2		3
4						0					1	1						0						0		4
5				1		1						0						0		1				1		5
6						0			2			2						0					1	1		6
7		1				1						0						0				1		1		7
8						0						0						0						0		8
9				1		1				1		1						0			2			2		9
10						0						0						0						0		10
11						0			4			4						0		1	1		1	3		11
12						0						0						0			1			1		12
13						0						0						0			1		1	2		13
14						0						0						0						0		14
15						0		1	1	1		3						0		1				1		15
16						0						0						0				1		1		16
17						0						0						0		1		2		3		17
18						0						0			1			1						0		18
19						0						0						0			1		2	3		19
20						0						0						0						0		20
21				1		1						0						0		1	2			3		21
22						0						0						0				2		2		22
23						0					1	1						0						0		23
24						0						0						0			2			2		24
25						0						0						0						0		25
26						0			1		1	2						0				1		1		26
27						0						0						0			2			2		27
28						0			1		1	2						0						0		28
29						0						0						0		1	1	1	1	4		29
30						0						0						0						0		30
Total		2	0	3	0	5	0	1	10	4	4	19	0	1	1	1	0	3	0	7	15	8	6	36
number of mosquito nockdown (1-hr)						Total						Total						Total						Total
Escape chamber		0	0	0	0	0		1	1	0	0	2		0	0	0	0	0		0	0	0	0	0
Non escape chamber		0	0	0	0	0		3	3	1	0	7		0	0	0	0	0		3	2	3	2	10
number of mosquito mortality (24-hr)						Total						Total						Total						Total
Escape chamber		0	0	0	0	0		0	0	0	0	0		0	0	0	0	0		0	0	1	0	1
Non escape chamber		0	0	0	0	0		2	3	3	4	12		0	0	0	0	0		4	3	5	4	16

## Sheet: Del-Non SIT
Species	Ae. aegypti (male)					test				deltamethrin					Conc.	0.0007		%			Status		non-sterile
Chamber		(1) Control Noncontact						(2) Treatment NonC						(3) Control Contact						(4) Treat Contact
Rep.		1	2	3	4	Total		1	2	3	4	Total		1	2	3	4	Total		1	2	3	4	Total
No. of Test		15	14	15	16	60		15	15	15	15	60		15	15	15	15	60		15	15	15	15	60		T
Time 0						0						0				1		1						0		0
1						0						0						0		1				1		1
2		1				1			1			1						0						0		2
3						0				2		2		1				1			2			2		3
4						0					1	1						0						0		4
5				1		1						0						0		1				1		5
6						0			2			2						0					1	1		6
7		1				1						0						0				1		1		7
8						0						0				1		1						0		8
9				1		1				1		1						0						0		9
10						0						0						0						0		10
11						0						0						0		1			1	2		11
12						0						0						0						0		12
13						0						0			1			1			1		1	2		13
14						0						0						0						0		14
15						0		1	1	1		3						0		1				1		15
16						0						0						0				1		1		16
17						0						0						0		1		2		3		17
18						0						0			1			1						0		18
19						0				1		1						0			1		2	3		19
20						0						0						0						0		20
21				1		1		1				1						0		1	2			3		21
22						0						0						0				2		2		22
23						0					1	1						0						0		23
24						0		1				1						0			2			2		24
25						0						0						0						0		25
26						0			1		1	2						0				1		1		26
27						0						0						0			2			2		27
28						0					1	1						0						0		28
29						0						0						0		1	1	1	1	4		29
30						0						0						0						0		30
Total		2	0	3	0	5	0	3	5	5	4	17	0	1	2	2	0	5	0	7	11	8	6	32
number of mosquito nockdown (1-hr)						Total						Total						Total						Total
Escape chamber		0	0	0	0	0		1	1	0	0	2		1	0	0	0	1		1	0	0	0	1
Non escape chamber		0	0	0	0	0		3	3	1	0	7		0	0	0	1	1		3	2	3	2	10
number of mosquito mortality (24-hr)						Total						Total						Total						Total
Escape chamber		0	0	0	0	0		1	0	0	0	1		0	0	0	0	0		1	0	0	0	1
Non escape chamber		0	0	0	0	0		4	3	2	1	10		0	0	0	0	0		3	2	1	2	8
