# Supplementary material for: Irritant and repellent behaviors of sterile male Aedes aegypti (L.) (Diptera: Culicidae) mosquitoes are crucial in the development of disease control strategies applying sterile insect technique
Source: PeerJ. 2024 Mar 22;12:e17038. doi: 10.7717/peerj.17038 (PMC10962334; doi:10.7717/peerj.17038)
Supplement: Supplemental Information 4 [file peerj-12-17038-s004.xls]

## Sheet: TFT -SIT
Species	Ae. aegypti (male)					test				transfluthrin					Conc.	8.52e-05		%			Status		Sterile
Chamber		(1) Control Noncontact						(2) Treatment NonC						(3) Control Contact						(4) Treat Contact
Rep.		1	2	3	4	Total		1	2	3	4	Total		1	2	3	4	Total		1	2	3	4	Total
No. of Test		15	14	15	17	61		15	15	15	15	60		15	15	15	15	60		15	15	15	15	60		T
Time 0						0						0				1		1						0		0
1						0		1				1						0		1				1		1
2		1				1			1			1						0						0		2
3				1		1				2		2		1				1			2			2		3
4						0					1	1						0						0		4
5				1		1						0			1			1		1				1		5
6						0			2			2						0					1	1		6
7		1				1				1		1						0				1		1		7
8						0			2			2						0						0		8
9				1		1		1		1		2						0			2			2		9
10						0						0						0						0		10
11						0			4			4						0		1	1		1	3		11
12						0						0						0						0		12
13						0						0						0			1		1	2		13
14						0			2			2						0						0		14
15						0						0						0						0		15
16						0						0						0				1		1		16
17						0			1			1						0		1		2		3		17
18						0						0			1			1						0		18
19						0						0						0			1		2	3		19
20						0						0						0						0		20
21				1		1						0						0		1	2			3		21
22						0						0						0				2		2		22
23						0					1	1						0						0		23
24						0						0						0			2			2		24
25						0						0						0						0		25
26						0			1		1	2						0						0		26
27						0						0						0						0		27
28						0			1		1	2						0						0		28
29						0						0						0						0		29
30						0						0						0						0		30
Total		2	0	4	0	6	0	2	14	4	4	24	0	1	2	1	0	4	0	5	11	6	5	27
number of mosquito nockdown (1-hr)						Total						Total						Total						Total
Escape chamber		0	0	0	0	0		0	0	0	0	0		0	0	0	0	0		1	0	1	1	3
Non escape chamber		0	0	0	1	1		2	3	0	3	8		0	0	0	0	0		2	3	0	3	8
number of mosquito mortality (24-hr)						Total						Total						Total						Total
Escape chamber		0	0	0	0	0		0	0	0	0	0		0	1	0	0	1		0	0	1	0	1
Non escape chamber		0	0	0	0	0		2	3	3	4	12		0	0	0	0	0		4	3	5	4	16

## Sheet: TFT  Non SIT
Species	Ae. aegypti					Plant				DEET					Conc.	2.5		%			Status		non-sterile
Chamber		(1) Control Noncontact						(2) Treatment NonC						(3) Control Contact						(4) Treat Contact
Rep.		1	2	3	4	Total		1	2	3	4	Total		1	2	3	4	Total		1	2	3	4	Total
No. of Test		15	15	18	16	64		15	15	15	15	60		15	15	15	15	60		15	15	15	15	60		T
Time 0						0						0						0						0		0
1					1	1		3		2	1	6			1	2		3				1	2	3		1
2						0				1	2	3						0					1	1		2
3				1		1						0		2				2				3		3		3
4		1				1			3		1	4						0				2	2	4		4
5				1		1		1		2		3						0						0		5
6		1				1				1	1	2						0		2				2		6
7						0				1		1						0					1	1		7
8						0			4			4						0						0		8
9						0						0						0						0		9
10						0						0						0						0		10
11						0		1				1						0						0		11
12						0					1	1						0						0		12
13						0		1				1						0					1	1		13
14						0				1		1						0						0		14
15						0						0						0						0		15
16						0						0						0						0		16
17						0						0						0						0		17
18						0						0						0				2		2		18
19						0						0						0						0		19
20						0						0						0						0		20
21			2			2						0						0						0		21
22						0						0						0						0		22
23						0						0						0						0		23
24						0						0						0						0		24
25						0						0						0						0		25
26						0						0						0						0		26
27						0						0						0						0		27
28						0			2			2						0						0		28
29						0						0		1				1						0		29
30						0						0					1	1						0		30
Total		2	2	2	1	7	0	6	9	8	6	29	0	3	1	2	1	7	0	2	0	8	7	17
number of mosquito nockdown (1-hr)						Total						Total						Total						Total
Escape chamber		0	0	0	0	0		1	1	0	0	2		0	0	0	0	1		0	0	0	0	0
Non escape chamber		0	0	0	0	0		3	3	1	0	7		1	0	0	0	1		3	2	3	2	14
number of mosquito mortality (24-hr)						Total						Total						Total						Total
Escape chamber		1	0	0	0	1		1	0	0	0	1		0	0	0	0	0		1	0	0	0	1
Non escape chamber		0	0	0	1	1		4	3	2	1	10		0	0	0	0	0		4	5	3	3	15
